# Supplementary material for: UV-B exposure reduces the activity of several cell wall-dismantling enzymes and affects the expression of their biosynthetic genes in peach fruit (Prunus persica L., cv. Fairtime, melting phenotype)
Source: Royal Society of Chemistry journal article supplement (doi:10.1039/c8pp00505b), 2019-03-18
Supplement: c8pp00505b1.xlsx [file c8pp00505b1.xlsx]

## Sheet: Foglio1
Table S1: Blast analysis of selected genes against Prunus persica genome (https://www.rosaceae.org/species/prunus_persica/genome_v2.0)
Gene nomenclature	NCBI Accession number	Target Name	E-Value	Gene product
PpPME1	AB231903	Prupe.7G190400.1	0	Pectinesterase
PpPME1		Prupe.7G190300.1	2.80395e-24	Pectinesterase
PpPME1		Prupe.2G058200.1	2.78431e-13	Pectinesterase
PpPME1		Prupe.2G141200.1	1.3382e-05	Pectinesterase
PpPME1		Prupe.1G529400.1	0.000507349	Pectinesterase
PpPME1		Prupe.6G318500.1	0.00019235	Pectinesterase
PpPME1		Prupe.4G025200.1	0.0276482	Pectinesterase
PpPME1		Prupe.2G141000.1	0.104822	Pectinesterase
PpPME2	X95991	Prupe.7G190300.1	0	Pectinesterase
PpPME2		Prupe.7G190400.1	1.46823e-22	Pectinesterase
PpPME2		Prupe.1G330800.1	3.84553e-12	Pectinesterase
PpPME2		Prupe.1G123800.1	5.52751e-11	Pectinesterase
PpPME2		Prupe.2G141200.1	2.09564e-10	Pectinesterase
PpPME2		Prupe.2G278200.1	3.01224e-09	Pectinesterase
PpPME2		Prupe.1G178400.1	1.64154e-07	Pectinesterase
PpPME2		Prupe.1G132300.1	6.22353e-07	Pectinesterase
PpPME2		Prupe.1G123500.1	6.22353e-07	Pectinesterase
PpPME2		Prupe.6G318500.1	6.22353e-07	Pectinesterase
PpPME2		Prupe.1G132000.1	8.94562e-06	Pectinesterase
PpPME2		Prupe.1G529400.1	8.94562e-06	Pectinesterase
PpPME2		Prupe.1G529500.1	8.94562e-06	Pectinesterase
PpPME2		Prupe.8G264000.1	8.94562e-06	Pectinesterase
PpPME2		Prupe.2G058200.1	8.94562e-06	Pectinesterase
PpPME2		Prupe.1G123700.1	3.39154e-05	Pectinesterase
PpPME2		Prupe.6G344600.1	3.39154e-05	Pectinesterase
PpPME2		Prupe.6G318600.1	0.000487496	Pectinesterase
PpPME2		Prupe.3G031000.1	0.00184824	Pectinesterase
PpPME2		Prupe.4G025200.1	0.0265663	Pectinesterase
PpPME2		Prupe.8G264100.1	0.0265663	Pectinesterase
PpPME2		Prupe.7G192400.1	1.44774	Pectinesterase
PpPME2		Prupe.2G141000.1	5.48881	Pectinesterase
PpPME2		Prupe.8G263900.1	0.000208097	Pectinesterase
Ppβ-GAL	AY874412	Prupe.7G163100.4	0	β-galactosidase
Ppβ-GAL		Prupe.7G163100.3	0	β-galactosidase
Ppβ-GAL		Prupe.7G163100.2	0	β-galactosidase
Ppβ-GAL		Prupe.7G163100.1	0	β-galactosidase
Ppβ-GAL		Prupe.7G163100.5	0	β-galactosidase
Ppβ-GAL		Prupe.7G163100.6	0	β-galactosidase
Ppβ-GAL		Prupe.1G372800.1	0	β-galactosidase
Ppβ-GAL		Prupe.8G089500.1	0	β-galactosidase
Ppβ-GAL		Prupe.8G089500.2	0	β-galactosidase
Ppβ-GAL		Prupe.3G050200.1	9.80484e-132	β-galactosidase
Ppβ-GAL		Prupe.7G210000.1	6.67901e-100	β-galactosidase
Ppβ-GAL		Prupe.3G298200.1	1.73709e-78	β-galactosidase
Ppβ-GAL		Prupe.7G210000.2	1.1833e-47	β-galactosidase
Ppβ-GAL		Prupe.6G099700.2	3.46507e-21	β-galactosidase
Ppβ-GAL		Prupe.6G099700.1	3.46507e-21	β-galactosidase
Ppβ-GAL		Prupe.4G279500.1	1.15862e-13	β-galactosidase
Ppβ-GAL		Prupe.4G278500.3	3.4408e-11	β-galactosidase
Ppβ-GAL		Prupe.4G278500.2	3.4408e-11	β-galactosidase
Ppβ-GAL		Prupe.4G278500.1	3.4408e-11	β-galactosidase
Ppβ-GAL		Prupe.4G038600.1	3.4408e-11	β-galactosidase
Ppβ-GAL		Prupe.6G099700.3	1.30451e-09	β-galactosidase
Ppβ-GAL		Prupe.7G194500.1	1.46877e-05	β-galactosidase
Ppβ-GAL		Prupe.1G492800.2	5.56853e-05	β-galactosidase
Ppβ-GAL		Prupe.1G492800.1	5.56853e-05	β-galactosidase
Ppβ-GAL		Prupe.1G492800.3	0.000800413	β-galactosidase
Ppβ-GAL		Prupe.1G160600.2	0.000800413	β-galactosidase
Ppβ-GAL		Prupe.1G160600.1	0.000800413	β-galactosidase
PpPG	XM007213822	Prupe.4G262200.1	0	polygalacturonase
PpPG		Prupe.4G261900.1	0	polygalacturonase
PpPG		Prupe.4G262200.2	0	polygalacturonase
PpPG		Prupe.4G261800.1	0	polygalacturonase
PpPG		Prupe.4G261700.1	0	polygalacturonase
PpPG		Prupe.7G269200.1	0	polygalacturonase
PpPG		Prupe.6G202500.1	0	polygalacturonase
PpPG		Prupe.7G031900.1	2.60144e-38	polygalacturonase
PpPG		Prupe.7G036300.1	4.21012e-33	polygalacturonase
PpPG		Prupe.7G030700.1	9.79376e-27	polygalacturonase
PpPG		Prupe.7G005500.1	9.72518e-16	polygalacturonase
PpPG		Prupe.2G056500.1	3.6871e-16	polygalacturonase
PpPG		Prupe.7G269400.1	8.57707e-09	polygalacturonase
PpPG		Prupe.7G036000.1	2.54718e-05	polygalacturonase
PpPG		Prupe.3G005900.1	9.65709e-05	polygalacturonase
PpPG		Prupe.4G228600.1	0.286792	polygalacturonase
PpPG		Prupe.4G218900.1	0.286792	polygalacturonase
PpPG		Prupe.1G251200.1	1.08731	polygalacturonase
PpPG		Prupe.3G204200.1	1.08731	polygalacturonase
PpPG		Prupe.7G036100.1	1.08731	polygalacturonase
PpPG		Prupe.1G045000.1	4.12231	polygalacturonase
PpPG		Prupe.3G109400.1	4.12231	polygalacturonase
PpPG		Prupe.3G109500.1	4.12231	polygalacturonase
PpPG		Prupe.3G109100.1	4.12231	polygalacturonase
PpPG		Prupe.3G109700.1	4.12231	polygalacturonase
PpPG		Prupe.3G109200.1	4.12231	polygalacturonase
PpPG		Prupe.6G155200.1	4.12231	polygalacturonase
PpPG		Prupe.2G009300.1	4.12231	polygalacturonase
PpPG		Prupe.2G005600.1	4.12231	polygalacturonase
PpPG		Prupe.2G008600.1	4.12231	polygalacturonase
PpPG		Prupe.2G009400.1	4.12231	polygalacturonase
PpPG		Prupe.2G005700.1	4.12231	polygalacturonase
PpPG		Prupe.2G009200.1	4.12231	polygalacturonase
PpPG		Prupe.3G081700.1	0.000156288	polygalacturonase
PpPG		Prupe.8G181300.1	0.000156288	polygalacturonase
Actin	KP690196	Prupe.6G163400.2	0	actin
Actin		Prupe.6G163400.1	0	actin
Actin		Prupe.5G137100.1	0	actin
Actin		Prupe.2G235000.1	0	actin
Actin		Prupe.6G078800.1	0	actin
Actin		Prupe.7G077300.2	0	actin
Actin		Prupe.7G077300.1	0	actin
Actin		Prupe.6G254100.2	0	actin
Actin		Prupe.6G254100.3	0	actin
Actin		Prupe.6G254100.1	0	actin
